# Supplementary material
Source: publisher site journal article supplement (http://www.kjim.org/upload/media/kjim-2022-050-suppl1.pdf)
Supplement: Supplementary file 1 [file kjim-2022-050-suppl1.pdf]

**Supplementary Table 1. Date of investigations of 35 patients after the onset of symptoms**

| Patient no. | Date of onset of symptoms | Date of diagnosis | Date of chest CT                                                                               | Date of PFT    | DL <sub>CO</sub> | Date of serum sample collection                                                               |
|-------------|---------------------------|-------------------|------------------------------------------------------------------------------------------------|----------------|------------------|-----------------------------------------------------------------------------------------------|
| 1           | 29/08/20                  | 03/09/20          | 10/09/20 (13) – 19/09/20 (22) – 11/01/21 (136)                                                 | 11/01/21 (136) | N                | 10/09/20 (13) – 14/09/20 (17) – 18/09/20 (21) – 11/01/21 (136)                                |
| 2           | 12/02/20                  | 24/02/20          | 24/02/20 (13) – 10/03/20 (28) – 11/01/21 (335)                                                 | 11/01/21 (335) | N                | 11/01/21 (335)                                                                                |
| 3           | 15/09/20                  | 16/09/20          | 06/10/20 (22) – 12/01/21 (120)                                                                 | 12/01/21 (120) | N                | 21/09/20 (7) – 28/09/20 (14) – 12/01/21 (120)                                                 |
| 4           | 13/07/20                  | 23/07/20          | 23/07/20 (11) – 12/01/21 (184)                                                                 | 12/01/21 (184) | N                | 12/01/21 (184)                                                                                |
| 5           | 07/08/20                  | 10/08/20          | 11/08/20 (5) – 24/08/20 (18) – 13/01/21 (160)                                                  | 13/01/21 (160) | N                | 13/01/21 (160)                                                                                |
| 6           | 11/08/20                  | 11/08/20          | 13/01/21 (156)                                                                                 | 13/01/21 (156) | N                | 13/01/21 (156)                                                                                |
| 7           | 17/09/20                  | 18/09/20          | 18/09/20 (1) – 13/01/21 (118)                                                                  | 13/01/21 (118) | N                | 22/09/20 (5) – 28/09/20 (11) – 03/10/20 (16) – 16/10/20 (29) – 13/01/21 (118)                 |
| 8           | 08/06/20                  | 12/06/20          | 21/06/20 (14) – 02/07/20 (25) – 01/08/20 (55) – 21/01/21 (228)                                 | 21/01/21 (228) | N                | 21/01/21 (228)                                                                                |
| 9           | 27/06/20                  | 30/06/20          | 30/06/20 (4) – 30/07/20 (34) – 19/08/20 (54) – 18/09/20 (84) – 16/10/20 (112) – 27/01/21 (215) | 27/01/21 (215) | N                | 27/01/21 (215)                                                                                |
| 10          | 01/10/20                  | 09/10/20          | 12/10/20 (11) – 22/10/20 (21) – 28/01/21 (119)                                                 | 28/01/21 (119) | N                | 02/10/20 (1) – 09/10/20 (8) – 15/10/20 (14) – 19/10/20 (18) – 03/11/20 (33) – 28/01/21 (119)  |
| 11          | 12/11/20                  | 12/11/20          | 15/11/20 (4) – 25/11/20 (14) – 09/02/21 (90)                                                   | 09/02/21 (90)  | Y                | 14/11/20 (3) – 20/11/20 (9) – 24/11/20 (13) – 09/02/21 (90)                                   |
| 12          | 14/12/20                  | 17/12/20          | 19/01/21 (36) – 22/02/21 (70)                                                                  | 22/02/21 (70)  | Y                | 30/12/20 (16) – 05/01/21 (22) – 10/01/21 (27) – 16/01/21 (33) – 20/01/21 (37) – 22/02/21 (70) |
| 13          | 04/12/20                  | 12/12/20          | 12/12/20 (9) – 24/12/20 (21) – 22/02/21 (81)                                                   | 22/02/21 (81)  | Y                | 12/12/20 (9) – 17/12/20 (14) – 21/12/20 (18) – 22/02/21 (81)                                  |
| 14          | 20/11/20                  | 25/11/20          | 26/11/20 (7) – 23/02/21 (96)                                                                   | 23/02/21 (96)  | Y                | 26/11/20 (7) – 30/11/20 (11) – 23/02/21 (96)                                                  |
| 15          | 22/12/20                  | 24/12/20          | 29/12/20 (8) – 05/01/21 (15) – 12/01/21 (22) – 23/02/21 (64)                                   | 23/02/21 (64)  | Y                | 29/12/20 (8) – 03/01/21 (13) – 06/01/21 (16) – 11/01/21 (21) – 23/02/21 (64)                  |
| 16          | 04/09/20                  | 12/09/20          | 18/09/20 (13) – 02/03/21 (178)                                                                 | 02/03/21 (178) | Y                | 14/09/20 (9) – 21/09/20 (16) – 02/03/21 (178)                                                 |
| 17          | 02/01/21                  | 09/01/21          | 13/01/21 (10) – 02/03/21 (60)                                                                  | 02/03/21 (60)  | Y                | 12/01/21 (11) – 18/01/21 (17) – 21/01/21 (20) – 02/03/21 (60)                                 |
| 18          | 05/07/20                  | 08/07/20          | 08/07/20 (4) – 04/08/20 (31) – 20/10/20 (108) – 02/03/21 (241)                                 | 02/03/21 (241) | Y                | 02/03/21 (241)                                                                                |
| 19          | 09/11/20                  | 19/11/20          | 20/11/20 (12) – 03/12/20 (15) – 03/03/21 (115)                                                 | 03/03/21 (115) | Y                | 20/11/20 (12) – 25/11/20 (17) – 02/12/20 (24) – 16/12/20 (38) – 03/03/21 (115)                |
| 20          | 07/01/21                  | 07/01/21          | 03/03/21 (56)                                                                                  | 03/03/21 (56)  | Y                | 03/03/21 (56)                                                                                 |

**Supplementary Table 1. continued.**

| Patient no. | Date of onset of symptoms | Date of diagnosis | Date of chest CT                             | Date of PFT   | DL <sub>CO</sub> | Date of serum sample collection                                               |
|-------------|---------------------------|-------------------|----------------------------------------------|---------------|------------------|-------------------------------------------------------------------------------|
| 21          | 09/12/20                  | 12/12/20          | 04/03/21 (83)                                | 04/03/21 (83) | Y                | 04/03/21 (83)                                                                 |
| 22          | 08/01/21                  | 09/01/21          | 27/01/21 (20) – 04/03/21 (56)                | 04/03/21 (56) | Y                | 17/01/21 (10) – 22/01/21 (15) – 29/01/21 (22) – 04/03/21 (56)                 |
| 23          | 06/01/21                  | 14/01/21          | 14/01/21 (9) – 25/01/21 (20) – 04/03/21 (58) | 04/03/21 (58) | Y                | 15/01/21 (10) – 21/01/21 (16) – 25/01/21 (20) – 05/02/21 (31) – 04/03/21 (58) |
| 24          | 30/12/20                  | 31/12/20          | 01/01/21 (3) – 20/01/21 (22) – 05/03/21 (66) | 05/03/21 (66) | Y                | 01/01/21 (3) – 08/01/21 (10) – 13/01/21 (15) – 21/01/21 (23) – 05/03/21 (66)  |
| 25          | 30/12/20                  | 03/01/21          | 02/01/21 (4) – 19/01/21 (21) – 05/03/21 (66) | 05/03/21 (66) | Y                | 03/01/21 (5) – 07/01/21 (9) – 13/01/21 (15) – 21/01/21 (23) – 05/03/21 (66)   |
| 26          | 15/12/20                  | 15/12/20          | 09/03/21 (85)                                | 09/03/21 (85) | Y                | 09/03/21 (85)                                                                 |
| 27          | 11/01/21                  | 11/01/21          | 09/03/21 (58)                                | 09/03/21 (58) | Y                | 09/03/21 (58)                                                                 |
| 28          | 07/10/20                  | 07/10/20          | 10/02/21 (127)                               | N             | N                | 10/02/21 (127)                                                                |
| 29          | 19/10/20                  | 25/10/20          | 10/02/21 (115)                               | N             | N                | 10/02/21 (115)                                                                |
| 30          | 22/10/20                  | 22/10/20          | 30/10/20 (9) – 16/02/21 (118)                | N             | N                | 16/02/21 (118)                                                                |
| 31          | 23/10/20                  | 28/10/20          | 03/11/20 (12) – 16/02/21 (117)               | N             | N                | 16/02/21 (117)                                                                |
| 32          | 17/12/20                  | 20/12/20          | 25/02/21 (71)                                | N             | N                | 25/02/21 (71)                                                                 |
| 33          | 22/09/20                  | 24/09/20          | 25/02/21 (157)                               | N             | N                | 25/02/21 (157)                                                                |
| 34          | 08/09/20                  | 09/09/20          | 26/02/21 (172)                               | N             | N                | 26/02/21 (172)                                                                |
| 35          | 13/09/20                  | 15/09/20          | 04/03/21 (173)                               | N             | N                | 04/03/21 (173)                                                                |
| Total       |                           |                   |                                              | 27            | 17               |                                                                               |

Values are presented as day/month/year. Parenthesis ( ) shows the number of days since the onset of symptoms. When the same test was performed multiple times for each patient, the last test was performed during the study period.

CT, computed tomography; PFT, pulmonary function test; DL<sub>CO</sub>, diffusion capacity of lung; N, not performed; Y, performed.
